# Supplementary material for: Immunologic Signatures of Peripheral Blood T Cells Reveal the Outcome of p53MVA Vaccine and Pembrolizumab Treatment in Patients with Advanced Ovarian Cancer
Source: PubMed Central journal article supplement (PMC10732002; doi:10.1158/2767-9764.crc-23-0394), 2023-12-20
Supplement: crc-23-0394-s03.pdf [file crc-23-0394-s03.pdf]

**Supplementary Table S2.** Toxicities Grade 2 or higher possibly, probably, or definitely related to treatment

| <b>Adverse Event</b>                 | <b>Grade 2</b> | <b>Grade 3</b> |
|--------------------------------------|----------------|----------------|
| Diarrhea                             | 2              | 1              |
| Aspartate aminotransferase increased | 1              | 1              |
| Alkaline phosphatase increased       |                | 1              |
| Peripheral sensory neuropathy        |                | 1              |
| Fatigue                              | 2              |                |
| Anemia                               | 1              |                |
| Colitis                              | 1              |                |
| Fever                                | 1              |                |
| Flu like symptoms                    | 1              |                |
| Adrenal insufficiency                | 1              |                |
| Autoimmune disorder                  | 1              |                |
| Alanine aminotransferase increased   | 1              |                |
| Lymphocyte count decreased           | 1              |                |
| Hypoalbuminemia                      | 1              |                |
| Hypomagnesemia                       | 1              |                |
| Presyncope                           | 1              |                |
| Rash maculo-papular                  | 1              |                |
| Urticaria                            | 1              |                |
| Hypertension                         | 1              |                |
| Hypotension                          | 1              |                |
